# Supplementary material for: Gendered inequalities in occupational attainment of migrants and their descendants: An intergenerational comparison with stayers in the country of origin
Source: Research Square preprint supplement (doi:10.21203/rs.3.rs-7505879/v1), 2026-01-21
Supplement: Supplementary file 1 [file dd7d4bc16b0df8f28ccdb7a7.docx]

Supplementary material

2025/08/20

Missing analysis

The cases with an item-missing cause the elimination of 2,224 cases out of 8,887 (30% of the total number of eligible cases). The filtering of missing cases may raise questions as to whether any systematic bias was introduced into the statistical estimations as a result. As a result, in this document we provide an auxiliary analysis of missing cases.

Table 1 shows how having a missing value for parental background (occupation and parental education) variables is predicted by our other independent variables. Being younger, divorced or separated, or a stayer is linked to having a missing parental occupation and parental education. That said, we do not have any reason to believe that those missing ISEI values will be systematically different from valid values. Having age, marital status, and migration status variables included in our models adjusts for any potential bias that may be introduced by the selection effects related to them.

Table 1: Regression for having an item missing in one of the dependent variables

| Dependent variable: having an item missing | |
| --- | --- |
|  | beta / SE |
| Age | -0.0514*** |
|  | -0.00318 |
| Female | -0.0372 |
|  | -0.0407 |
| Marital status (ref: Married) | |
| Divorced/separated | 0.245** |
|  | -0.112 |
| Never married | -0.0316 |
|  | -0.0503 |
| Other | -0.314 |
|  | -0.337 |
| Migration status (ref:stayer) | |
| Migrant to Europe | -0.145** |
|  | -0.058 |
| Born in Europe | -0.613*** |
|  | -0.0717 |
|  |  |
| Personal education | 0.015 |
|  | -0.019 |
|  |  |
| Constant | 1.113*** |
|  | -0.148 |
|  |  |
| N | 8,055 |
| R2 | 0.11 |

As a second step, in Table 2, we provide a series of models for the item-nonresponse using ISEI scores as the outcome variable. Since an overwhelming majority of our item-nonresponse comes from parental education and parental occupation variables, we run an OLS regression analysis, where we include all our independent variables with the exception of parental education and occupation, and we add the item-nonresponse variable (the outcome variable in the previous table) to see how item-nonresponse for parental background variables is associated with ISEI scores.

The filtered cases (due to missing parental information) of women and the better educated turned out to be occupationally better off than their non-filtered comparators, whereas the Europe-born are worse off. These results may suggest that we slightly overestimate the occupational outcomes of those born in Europe. That said, we were not able to identify any potential mechanisms by which our substantial interpretations of the interaction effects would change. Since we include all the relevant variables in our models, our results are adjusted for potential selection bias in the dataset.

Table 2: Regression for ISEI scores

| Dependent variable: ISEI score | | |  |  |  |
| --- | --- | --- | --- | --- | --- |
|  | Model 1 | Model 2 | Model 4 | Model 3 | Model 5 |
|  | beta / SE | beta / SE | beta / SE | beta / SE | beta / SE |
| Item-missing | -2.79* | -0.29 | 1.02 | 0.49 | -3.67** |
|  | -1.38 | -0.53 | -0.74 | -0.57 | -1.17 |
| Age | -0.2*** |  |  |  |  |
|  | -0.02 |  |  |  |  |
| Age * item-missing | 0.06 |  |  |  |  |
|  | -0.04 |  |  |  |  |
| Female |  | 3.41*** |  |  |  |
|  |  | -0.53 |  |  |  |
| Female * item-missing | | 2.83** |  |  |  |
|  |  | -0.93 |  |  |  |
| Migration status (ref: Stayer) | | |  |  |  |
| Migrant to Europe | |  | -5.63*** |  |  |
|  |  |  | -0.57 |  |  |
| Born in Europe | |  | 1.33 |  |  |
|  |  |  | -0.7 |  |  |
| Migrant to Europe * item missing | | | -0.41 |  |  |
|  |  |  | -1.06 |  |  |
| Born in Europe * item missing | | | -3.9** |  |  |
|  |  |  | -1.24 |  |  |
| Marital status (ref: Married) | | |  |  |  |
| Divorced/separated | |  |  | 2.74 |  |
|  |  |  |  | -1.58 |  |
| Never married | |  |  | 4.17* |  |
|  |  |  |  | -0.61 |  |
| Other |  |  |  | 3.22 |  |
|  |  |  |  | -2.99 |  |
| Divorced/seperated * item missing | | | | -4.03 |  |
|  |  |  |  | -2.34 |  |
| Never married * item missing | | |  | -0.81 |  |
|  |  |  |  | -0.95 |  |
| Other * item missing | |  |  | -9.53* |  |
|  |  |  |  | -3.77 |  |
| Personal education | |  |  |  | 6.26*** |
|  |  |  |  |  | -0.17 |
| Personal education * item missing | | | |  | 0.93** |
|  |  |  |  |  | -0.33 |
|  |  |  |  |  |  |
| Constant | 43.32 | 34.93 | 37.44 | 35.16 | 13.89 |
|  | -0.83 | -0.29 | -0.45 | -0.29 | -0.54 |
|  |  |  |  |  |  |
| N | 8633 | 8854 | 8916 | 8669 | 8630 |
| R2 | 0.015 | 0.017 | 0.011 | 0.013 | 0.309 |
